# Supplementary material for: Report on an unusual case of leprosy from Germany: just an exception of the rule?
Source: Springer Nature journal article supplement (doi:10.1007/s15010-019-01349-8), 2019-08-27
Supplement: MOESM1 [file 17106980]

## Report on an unusual case of leprosy from Germany: just an exception of the rule?

Malkin Saar\*, Ingrid Hanus, Kristina Huber, Marcus Beissner, Thomas Löscher, Gisela Bretzel.

\*Corresponding author: Division of Infectious Diseases and Tropical Medicine, University Hospital, Ludwig-Maximilians-University (LMU) Munich, Germany; Email: Malkin.Saar@lrz.uni-muenchen.de

**Infection – a journal of infectious disease**

### Supplementary material 1: 16S rRNA RT qPCR run protocol

**Assay:** 16S rRNA RT qPCR  
**Analysis:** Detection of *Mycobacterium leprae* cDNA (16S rRNA)  
**Type of PCR:** Reverse transcriptase- quantitative real-time PCR

| <b>Primer:</b> (10 $\mu$ M) |                                   | <b>Probe:</b> (5 $\mu$ M) |                                            |
|-----------------------------|-----------------------------------|---------------------------|--------------------------------------------|
| <b>16S TaqF</b>             | 5' GCA TGT CTT GTG GTG GAA AGC 3' | <b>16TP2</b>              | 5' 6FAM- CCA TCC TGC ACC GCA AAA A -BBQ 3' |
| <b>16S TaqR</b>             | 5' CAC CCC ACC AAC AAG CTG AT 3'  |                           |                                            |

| Reagent                                         | Number of samples:         |                      | plus 10%:                 |                     | Remarks             |
|-------------------------------------------------|----------------------------|----------------------|---------------------------|---------------------|---------------------|
|                                                 | Single reaction [ $\mu$ l] | Mastermix [ $\mu$ l] | Concentration of solution | Final concentration |                     |
| DEPC Water                                      | 8,60                       |                      |                           |                     | Carl Roth           |
| 16S TaqF                                        | 1,00                       |                      | 10 $\mu$ M                | 0,5 $\mu$ M         | TibMolBiol - HPLC   |
| 16S TaqR                                        | 1,00                       |                      | 10 $\mu$ M                | 0,5 $\mu$ M         | TibMolBiol - HPLC   |
| 16S TP2                                         | 1,00                       |                      | 5 $\mu$ M                 | 0.2 $\mu$ M         | TibMolBiol - HPLC   |
| qPCR Mix Plus                                   | 4,00                       |                      | 5 U/ $\mu$ l              | 1 U/ $\mu$ l        | Solis BioDyne       |
| Exo IPC Mix                                     | 2,00                       |                      | 10x                       | 1x                  | Applied Biosystems* |
| Exo IPC DNA                                     | 0,40                       |                      | 50x                       | 1x                  | Applied Biosystems* |
| <b>Total vol. Mastermix [<math>\mu</math>l]</b> | <b>18,00</b>               |                      |                           |                     |                     |
| Template                                        | 2,00                       |                      |                           |                     |                     |
| Final volume                                    | 20,00                      |                      |                           |                     |                     |

\*formerly Life Technologies

| Step: | Temperature: | Time:   |
|-------|--------------|---------|
| 1     | 95°C         | 15 min. |
| 2     | 95°C         | 15 s    |
| 3     | 60°C         | 60 s    |

(Step 2-3: 40x)

Duration 1:38h

**Detection in VIC and FAM channels of the CFX96 real-time PCR detection system (BioRad, Munich, Germany) after each step 3.**

| Sample number | Sample (Patient/ID) | Result | Dilution        |
|---------------|---------------------|--------|-----------------|
| 1             |                     |        | 10 <sup>^</sup> |
| 2             |                     |        | 10 <sup>^</sup> |
| 3             |                     |        | 10 <sup>^</sup> |
| 4             |                     |        | 10 <sup>^</sup> |
| 5             |                     |        | 10 <sup>^</sup> |
| 6             |                     |        | 10 <sup>^</sup> |
| 7             |                     |        | 10 <sup>^</sup> |
| 8             |                     |        | 10 <sup>^</sup> |
| 9             |                     |        | 10 <sup>^</sup> |
| 10            |                     |        | 10 <sup>^</sup> |
| 11            |                     |        | 10 <sup>^</sup> |
| 12            |                     |        | 10 <sup>^</sup> |
| 13            |                     |        | 10 <sup>^</sup> |
| 14            |                     |        | 10 <sup>^</sup> |
| 15            |                     |        | 10 <sup>^</sup> |
| 16            |                     |        | 10 <sup>^</sup> |
| 17            |                     |        | 10 <sup>^</sup> |
| 18            |                     |        | 10 <sup>^</sup> |
| 19            |                     |        | 10 <sup>^</sup> |
| 20            |                     |        | 10 <sup>^</sup> |
| 21            |                     |        | 10 <sup>^</sup> |
| 22            |                     |        | 10 <sup>^</sup> |
| 23            |                     |        | 10 <sup>^</sup> |
| 24            |                     |        | 10 <sup>^</sup> |
| 25            |                     |        | 10 <sup>^</sup> |
| 26            |                     |        | 10 <sup>^</sup> |
| 27            |                     |        | 10 <sup>^</sup> |
| 28            |                     |        | 10 <sup>^</sup> |
| 29            |                     |        | 10 <sup>^</sup> |
| 30            |                     |        | 10 <sup>^</sup> |
| 31            |                     |        | 10 <sup>^</sup> |
| 32            |                     |        | 10 <sup>^</sup> |
| 33            |                     |        | 10 <sup>^</sup> |
| 34            |                     |        | 10 <sup>^</sup> |
| 35            |                     |        | 10 <sup>^</sup> |
| 36            |                     |        | 10 <sup>^</sup> |
| 37            |                     |        | 10 <sup>^</sup> |
| 38            |                     |        | 10 <sup>^</sup> |
| 39            |                     |        | 10 <sup>^</sup> |
| 40            |                     |        | 10 <sup>^</sup> |
| 41            |                     |        | 10 <sup>^</sup> |
| 42            |                     |        | 10 <sup>^</sup> |
| 43            |                     |        | 10 <sup>^</sup> |
| 44            |                     |        | 10 <sup>^</sup> |
| 45            |                     |        | 10 <sup>^</sup> |
| 46            |                     |        | 10 <sup>^</sup> |
| 47            |                     |        | 10 <sup>^</sup> |
| 48            |                     |        | 10 <sup>^</sup> |

Remarks: \_\_\_\_\_
